# Supplementary material for: Influence of a Non-Ionic Surfactant in the Microstructure and Rheology of a Pickering Emulsion Stabilized by Cellulose Nanofibrils
Source: MDPI journal article supplement (doi:10.3390/polym13213625), 2021-10-21
Supplement: s1 [file s1]

## Supporting Information

# Influence of a Non-Ionic Surfactant in the Microstructure and Rheology of a Pickering Emulsion Stabilized by Cellulose Nanofibrils

Jorge Velásquez-Cock <sup>1,\*</sup>, Angélica María Serpa <sup>2</sup>, Catalina Gómez-Hoyos <sup>1</sup>, Piedad Gañán <sup>3</sup>, Manuel Romero-Sáez <sup>4</sup>, Lina María Vélez <sup>2</sup>, Natalia Correa-Hincapié <sup>4</sup> and Robin Zuluaga <sup>2</sup>

<sup>1</sup> Programa de Ingeniería en Nanotecnología, Universidad Pontificia Bolivariana, Medellín 050031, Colombia; catalina.gomezh@upb.edu.co

<sup>2</sup> Facultad de Ingeniería Agroindustrial, Universidad Pontificia Bolivariana, Medellín 050031, Colombia; angelicaserpa31@gmail.com (A.M.S.); lina.velez@upb.edu.co (L.M.V.); robin.zuluaga@upb.edu.co (R.Z.)

<sup>3</sup> Facultad de Ingeniería Química, Universidad Pontificia Bolivariana, Medellín 050031, Colombia; [piedad.ganan@upb.edu.co](mailto:piedad.ganan@upb.edu.co)

<sup>4</sup> Grupo Calidad, Metrología y Producción, Instituto Tecnológico Metropolitano, Medellín 050034, Colombia; manuelromero@itm.edu.co (M.R.-S.); nataliacorrea@itm.edu.co (N.C.-H.)

\* Correspondence: [jorgeandres.velasquez@upb.edu.co](mailto:jorgeandres.velasquez@upb.edu.co)

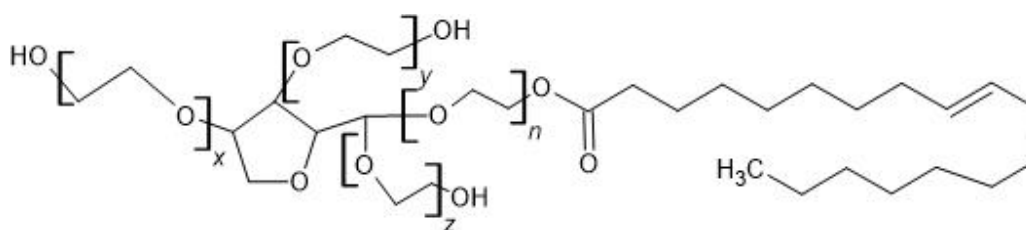

**Figure S1.** Chemical structure of polysorbate 80.  $x + y + z + n = 20$ .

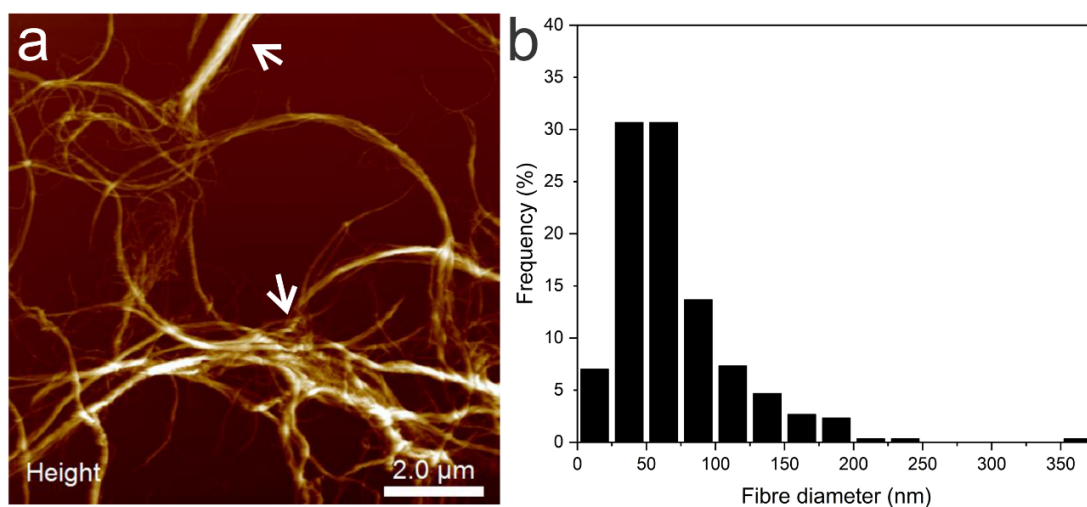

**Figure S2.** Atomic force microscopy height image of dried CNFs (a), and a fiber diameter frequency histogram (b).

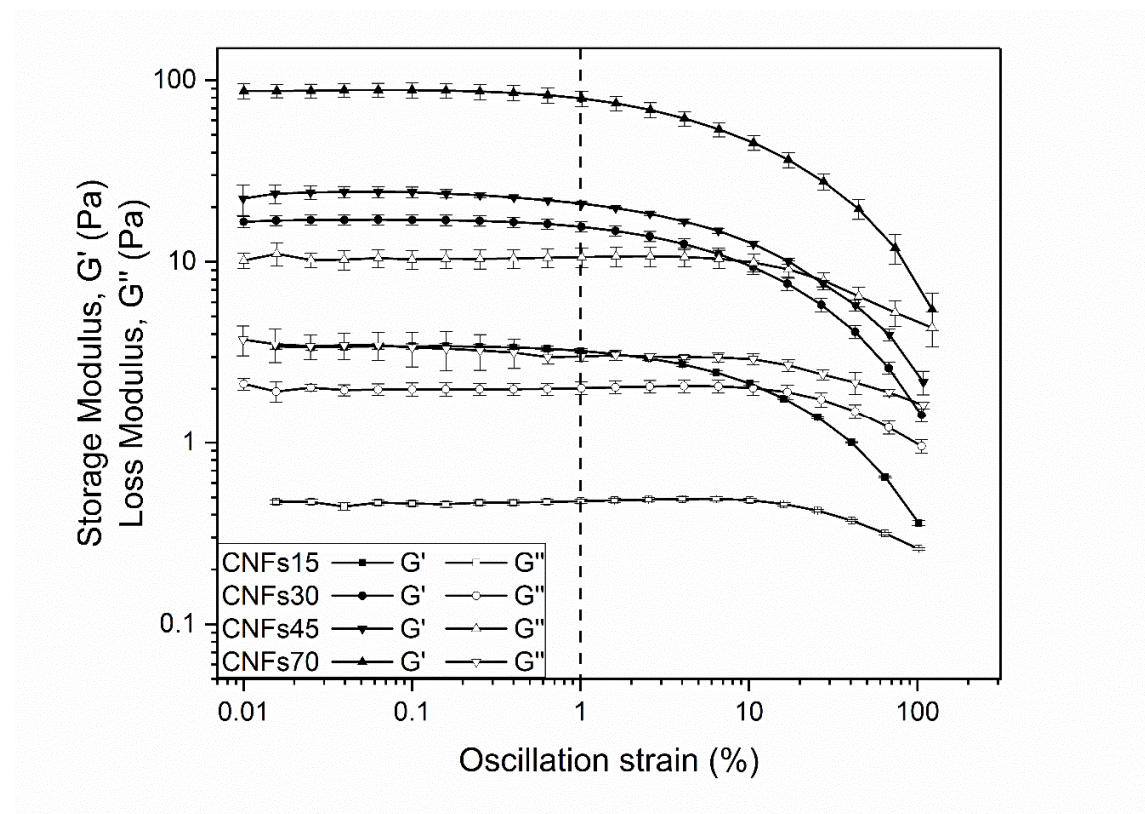

**Figure S3.** Amplitude sweep of cellulose suspensions containing 0.15, 0.3, 0.45 and 0.7 wt.% of CNFs, after their homogenization.

**Table S1.** Lipid profile of the coconut oil incorporated in the emulsions.

| Fatty Acid | Fatty Acid Content (g/100 g) |
|------------|------------------------------|
| C6:0       | 0.535 ± 0.002                |
| C8:0       | 7.058 ± 0.017                |
| C10:0      | 5.855 ± 0.017                |
| C12:0      | 49.145 ± 0.022               |
| C14:0      | 17.523 ± 0.024               |
| C16:0      | 7.652 ± 0.025                |
| C17:0      | Not detected                 |
| C18:0      | 2.851 ± 0.004                |
| C20:0      | Not detected                 |
| C16:1      | Not detected                 |
| C18:1n9c   | 4.310 ± 0.009                |
| C20:1n9    | Not detected                 |
| C18:2n6c   | 0.692 ± 0.002                |
| C18:3n3    | Not detected                 |

**Table S2.** Surface tension of the coconut oil-buffer interphase, measured at various times and using different concentrations of polysorbate 80 dissolved in the aqueous phase.

| Time (min) | Surface Tension (dyn cm <sup>-1</sup> ) |             |             |
|------------|-----------------------------------------|-------------|-------------|
|            | 0                                       | 15          | 30          |
| 0 wt. %    | 15.81 ± 2.04                            | 5.84 ± 0.74 | 4.12 ± 0.49 |
| 0.1 wt. %  | 2.94 ± 0.77                             | 0.81 ± 0.13 | 0.61 ± 0.05 |
| 0.2 wt. %  | 3.09 ± 0.45                             | 0.85 ± 0.08 | 0.63 ± 0.07 |
| 0.4 wt. %  | 2.47 ± 0.13                             | 0.72 ± 0.04 | 0.7 ± 0.06  |
| 0.6 wt. %  | 2.19 ± 0.13                             | 0.55 ± 0.02 | 0.52 ± 0.02 |
| 1 wt. %    | 1.77 ± 0.08                             | 0.57 ± 0.01 | 0.55 ± 0.01 |
